# Supplementary material for: Effects of cation size on thermoelectricity of PEDOT:PSS/ionic liquid hybrid films for wearable thermoelectric generator application
Source: Royal Society of Chemistry journal article supplement (doi:10.1039/d2ta05134f), 2022-01-01
Supplement: d2ta05134f1.pdf [file d2ta05134f1.pdf]

## Electronic Supplementary Information

### Effects of Cationic Size on Thermoelectricity of PEDOT:PSS/Ionic Liquids Hybrid Films for Wearable Thermoelectric Generator Application

*Kexing Jiang,<sup>a‡</sup> Shao-Huan Hong,<sup>a‡</sup> Shih-Huang Tung<sup>b</sup> and Cheng-Liang Liu<sup>\*c</sup>*

- a. Department of Chemical and Materials Engineering, National Central University, Taoyuan 32001, Taiwan.
- b. Institute of Polymer Science and Engineering, National Taiwan University, Taipei 10617, Taiwan.
- c. Department of Materials Science and Engineering, National Taiwan University, Taipei 10617, Taiwan. E-mail: liucl@ntu.edu.tw

‡ These Authors Contributed equally to this work.

## ***Characterization***

The thicknesses of the thermoelectric films were measured by Alpha-Step® D-300 stylus profiler. The ultraviolet-visible-near-infrared (UV-Vis-NIR) absorption spectra were measured using a Hitachi U4100 spectrophotometer. The Raman spectra of the films were obtained using a Raman spectroscopy (Horiba Jobin-Yvon LabRam HR800) with a Nd:YAG laser with the excitation wavelength of 532 nm. A surface chemical analysis instrument (VG Scientific ESCALAB 250) was employed to measure the X-ray photoelectron spectroscopy (XPS) spectra. Synchrotron-based GIXRD was performed at the B13A1 beamlines at National Synchrotron Radiation Research Center (NSRRC, Taiwan). Surface morphologies of the PEDOT:PSS films were determined by a tapping mode atomic force microscopy (Hitachi 5100N) under ambient condition. The work function was determined from the photoelectron emission yield measured by a Photon Electron Spectroscopy in Air (PESA) system (RIKEN KEIKI AC-2) operating at room temperature. The carrier concentration and mobility measurements were performed using a Hall measurement system (Ecopia HMS-3000) at room temperature.

**Table S1** Summary of the thermoelectric properties of PEDOT:PSS/ionic liquids hybrid films.

| Ionic liquid         | Process         | Conductivity<br>[S cm <sup>-1</sup> ] | Seebeck coefficient<br>[ $\mu$ V K <sup>-1</sup> ] | Power factor<br>[ $\mu$ W m <sup>-1</sup> K <sup>-2</sup> ] | Ref.      |
|----------------------|-----------------|---------------------------------------|----------------------------------------------------|-------------------------------------------------------------|-----------|
| Li TFSI              | Solution mixing | ~1000                                 | 19-35                                              | 75                                                          | 1         |
| MMIM BF <sub>4</sub> | Solution mixing | 330.8                                 | 35.7                                               | 39.8                                                        | This work |
| MMIM TFSI            | Solution mixing | 520                                   | 17                                                 | 15                                                          | 2         |
| EMIM BF <sub>4</sub> | Solution mixing | 497.2                                 | 32.7                                               | 53.1                                                        | This work |
| EMIM TFSI            | Solution mixing | 810                                   | 12                                                 | 11                                                          | 2         |
| EMIM DCA             | Solution mixing | 275                                   | 35                                                 | 33                                                          | 3         |
| EMIM DCA             | Solution mixing | 913                                   | 47                                                 | 167                                                         | 4         |
| EMIM DCI             | Solution mixing | 538                                   | 29                                                 | 42                                                          | 3         |
| EMIM TCM             | Solution mixing | 1000                                  | 30                                                 | 90                                                          | 5         |
| EMIM TCM             | Solution mixing | 1163                                  | 38.8                                               | 175                                                         | 6         |
| EMIM TCM             | Solution mixing | ~140                                  | ~22                                                |                                                             | 7         |
| EMIM TCB             | Solution mixing | ~85                                   | ~23                                                |                                                             | 7         |
| EMIM TCB             | Solution mixing | ~600                                  | 18                                                 | 28                                                          | 4         |

|                      |                 |            |          |          |           |
|----------------------|-----------------|------------|----------|----------|-----------|
| EMIM ES              | Solution mixing | ~32        | ~25      |          | 7         |
| BMIM BF <sub>4</sub> | Solution mixing | 566.3      | 31.6     | 56.7     | This work |
| BMIM BF <sub>4</sub> | Solution mixing | 174.87     | 30.1     | 8.4      | 8         |
| BMIM BF <sub>4</sub> | Solution mixing | ~570       | 25       | 29       | 4         |
| BMIM Br              | Solution mixing | 123.07     | 30.6     | 9.9      | 8         |
| HMIM BF <sub>4</sub> | Solution mixing | 729.0      | 28.7     | 60.1     | This work |
| MMIM BF <sub>4</sub> | Post treatment  | 1447.3     | 24.4     | 86.2     | This work |
| BMIM TFSI            | Post treatment  | 641        | 61.1     | 239.2    | 9         |
| BMIM OTf             | Post treatment  | 1260±61    | 34.8±1.8 | 152±11.2 | 10        |
| BMIM BF <sub>4</sub> | Post treatment  | 1654.2     | 19.6     | 63.5     | This work |
| BMIM BF <sub>4</sub> | Post treatment  | 1188±45    | 33.9±1.9 | 137±12.5 | 10        |
| EMIM TCM             | Post treatment  | ~1100      | 31.9     | 117      | 5         |
| EMIM TFSI            | Post treatment  | 380        | 42       | 40       | 11        |
| EMIM DCA             | Post treatment  | 450        | 42       | 85       | 4         |
| EMIM DCA             | Post treatment  | 568.2      | 38.4     | 83.8     | 12        |
| EMIM DCA             | Post treatment  | 3400       | 43       |          | 13        |
| EMIM DCA             | Post treatment  | ~1500-1600 | ~65      | 754      | 14        |
| EMIM TCB             | Post treatment  | 330        | 25       | 25       | 4         |

|                                               |                |         |          |       |           |
|-----------------------------------------------|----------------|---------|----------|-------|-----------|
| EMIM BF <sub>4</sub>                          | Post treatment | 1534.1  | 21.4     | 70.3  | This work |
| EMIM BF <sub>4</sub>                          | Post treatment | 480     | 27       | 40    | 4         |
| EMIM BF <sub>4</sub>                          | Post treatment | ~700    | ~24      | 38.46 | 15        |
| HMIM BF <sub>4</sub>                          | Post treatment | 1974.2  | 19.5     | 75.1  | This work |
| [CoCl <sub>2</sub> ·6H <sub>2</sub> O]:[ChCl] | Post treatment | 1648±56 | 21.6±0.4 | 76.8  | 16        |

---

**Table S2** Physical properties of ionic liquids in this study.

| Ionic liquid         | Viscosity<br>[mPa s] | Density<br>[g cm <sup>-3</sup> ] | Molar mass<br>[g mol <sup>-1</sup> ] |
|----------------------|----------------------|----------------------------------|--------------------------------------|
| MMIM BF <sub>4</sub> | 34                   | 1.30                             | 183.95                               |
| EMIM BF <sub>4</sub> | 60                   | 1.29                             | 197.97                               |
| BMIM BF <sub>4</sub> | 140                  | 1.26                             | 226.05                               |
| HMIM BF <sub>4</sub> | 260                  | 1.15                             | 268.10                               |

**Table S3** XPS Results: deconvoluted S 2p peaks of the XPS spectra for spin-coated pristine PEDOT:PSS film and PEDOT:PSS/XMIM BF<sub>4</sub> hybrid films with formamide post treatment.

| Sample                             | Chemical state            | Binding energy [eV] | Area percentage [%] | PEDOT to PSS composition ratio |
|------------------------------------|---------------------------|---------------------|---------------------|--------------------------------|
| PEDOT:PSS                          | PSS S 2p <sub>1/2</sub>   | 169.39              | 23.67               | 1:2.44                         |
|                                    | PSS S 2p <sub>3/2</sub>   | 168.23              | 47.30               |                                |
|                                    | PEDOT S 2p <sub>1/2</sub> | 165.47              | 19.35               |                                |
|                                    | PEDOT S 2p <sub>3/2</sub> | 164.31              | 9.68                |                                |
| PEDOT:PSS<br>/MMIM BF <sub>4</sub> | PSS S 2p <sub>1/2</sub>   | 168.84              | 17.94               | 1:1.16                         |
|                                    | PSS S 2p <sub>3/2</sub>   | 167.68              | 35.85               |                                |
|                                    | PEDOT S 2p <sub>1/2</sub> | 165.41              | 15.41               |                                |
|                                    | PEDOT S 2p <sub>3/2</sub> | 164.25              | 30.80               |                                |
| PEDOT:PSS<br>/EMIM BF <sub>4</sub> | PSS S 2p <sub>1/2</sub>   | 169.01              | 18.40               | 1:1.23                         |
|                                    | PSS S 2p <sub>3/2</sub>   | 167.85              | 36.77               |                                |
|                                    | PEDOT S 2p <sub>1/2</sub> | 165.45              | 14.95               |                                |

|                       |                           |        |       |        |
|-----------------------|---------------------------|--------|-------|--------|
|                       | PEDOT S 2p <sub>3/2</sub> | 164.29 | 29.89 |        |
|                       | PSS S 2p <sub>1/2</sub>   | 168.95 | 18.60 |        |
| PEDOT:PSS             | PSS S 2p <sub>3/2</sub>   | 167.79 | 37.18 |        |
| /BMIM BF <sub>4</sub> | PEDOT S 2p <sub>1/2</sub> | 165.49 | 14.75 | 1:1.26 |
|                       | PEDOT S 2p <sub>3/2</sub> | 164.33 | 29.48 |        |
|                       | PSS S 2p <sub>1/2</sub>   | 169.16 | 19.14 |        |
| PEDOT:PSS             | PSS S 2p <sub>3/2</sub>   | 168.00 | 38.26 |        |
| /HMIM BF <sub>4</sub> | PEDOT S 2p <sub>1/2</sub> | 165.51 | 14.21 | 1:1.35 |
|                       | PEDOT S 2p <sub>3/2</sub> | 164.35 | 28.39 |        |



**Table S4** Summary of the thermoelectric properties of PEDOT:PSS-based thermoelectric generators.

| Treatment                                                   | Conductivity<br>[S cm <sup>-1</sup> ] | Seebeck coefficient<br>[ $\mu$ V K <sup>-1</sup> ] | Power factor<br>[ $\mu$ W m <sup>-1</sup> K <sup>-2</sup> ] | Leg<br>numbers | Output voltage<br>[mV] | Output power<br>[nW]                                    | Ref.      |
|-------------------------------------------------------------|---------------------------------------|----------------------------------------------------|-------------------------------------------------------------|----------------|------------------------|---------------------------------------------------------|-----------|
| PEDOT:PSS/MMIM BF <sub>4</sub>                              | 1447.3                                | 24.4                                               | 86.2                                                        | 7              | 2.4                    | 16.5 ( $\mu$ W cm <sup>-2</sup> )                       | This work |
| Doping with BSA and DMSO/HZ                                 | 1119                                  | 42.6                                               | 203.1                                                       | 16             | 4.6                    |                                                         | 17        |
| PEDOT:PSS (Clevios PJET 700)<br>ink printing                | 17 $\pm$ 1.5                          | 600 $\pm$ 70                                       | 17.12 $\pm$ 4.6                                             | 4/4            | 29.36                  | 0.419                                                   | 18        |
| Spray Printing and PS treatment                             | ~600                                  | ~15                                                |                                                             | 74             | 9.21                   | 2.23                                                    | 19        |
| Sulfuric acid treatment                                     | 2500                                  | 20.6                                               | 107                                                         | 5              | 2                      |                                                         | 20        |
| Formamide, Sulfuric acid and<br>NaBH <sub>4</sub> treatment | 1786                                  | 28.1                                               | 141                                                         | 14             | 2.9                    |                                                         | 21        |
| Polymerized PEDOT:OTf                                       | 2215 $\pm$ 665                        | 18.0                                               | 105                                                         | 312            |                        | 16.5 $\pm$ 0.5<br>(nW K <sup>-2</sup> m <sup>-2</sup> ) | 22        |
| Treated with EG/NaHCO <sub>3</sub>                          | 770                                   | 48                                                 | 183                                                         | 4/4            | 6.98                   | 98<br>( $\mu$ W cm <sup>-2</sup> )                      | 23        |
| PEDOT:PSS/WPU fibers                                        | 730                                   | ~19                                                | 26.1                                                        | 5/5            |                        | 0.311                                                   | 24        |
| PEDOT:PSS/WPU/EMIM TCM                                      | ~140                                  | ~22                                                |                                                             | 10             | 6.5                    | ~25                                                     | 7         |
| EG, DMSO and BMIM BF <sub>4</sub><br>treatment              | 172.5                                 | 14.8                                               | 4.77                                                        | 5/5            | 20.7                   | 481.2<br>( $\mu$ W cm <sup>-2</sup> )                   | 25        |

|                                             |          |         |         |    |       |       |    |
|---------------------------------------------|----------|---------|---------|----|-------|-------|----|
| Ag@NC <sub>Dots</sub> /PEDOT:PSS/PVA        | 287.4±19 | 65.55±3 | 123.5±6 | 12 | 15.12 | 15.59 | 26 |
| EG-H <sub>2</sub> SO <sub>4</sub> treatment | 676.59   | 13.13   | 9.42    |    | 1.7   |       | 27 |
| PEDOT:PSS/Te nanorod composite              | 122.4    | 51.6    | 51.4    | 8  | 2.5   |       | 28 |

---

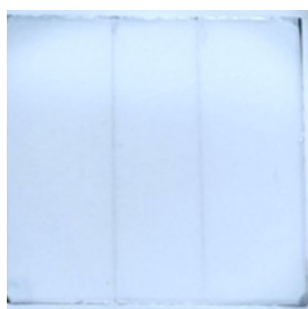

**PEDOT:PSS**

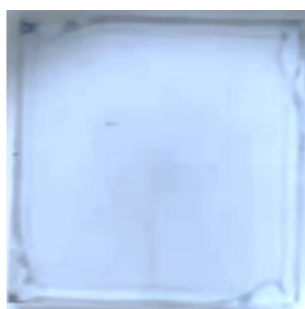

**w/MMIM BF<sub>4</sub>**

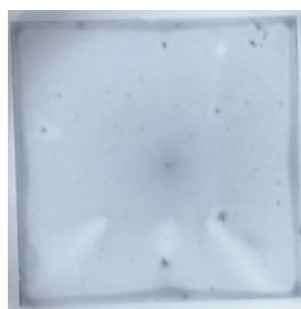

**w/EMIM BF<sub>4</sub>**

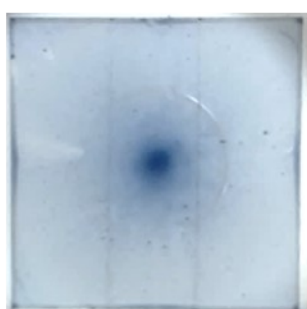

**w/BMIM BF<sub>4</sub>**

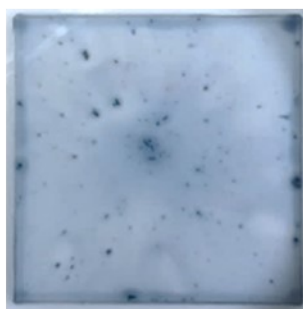

**w/HMIM BF<sub>4</sub>**

**Fig. S1** Photograph of spin-coated XMIM BF<sub>4</sub> modified PEDOT:PSS films.

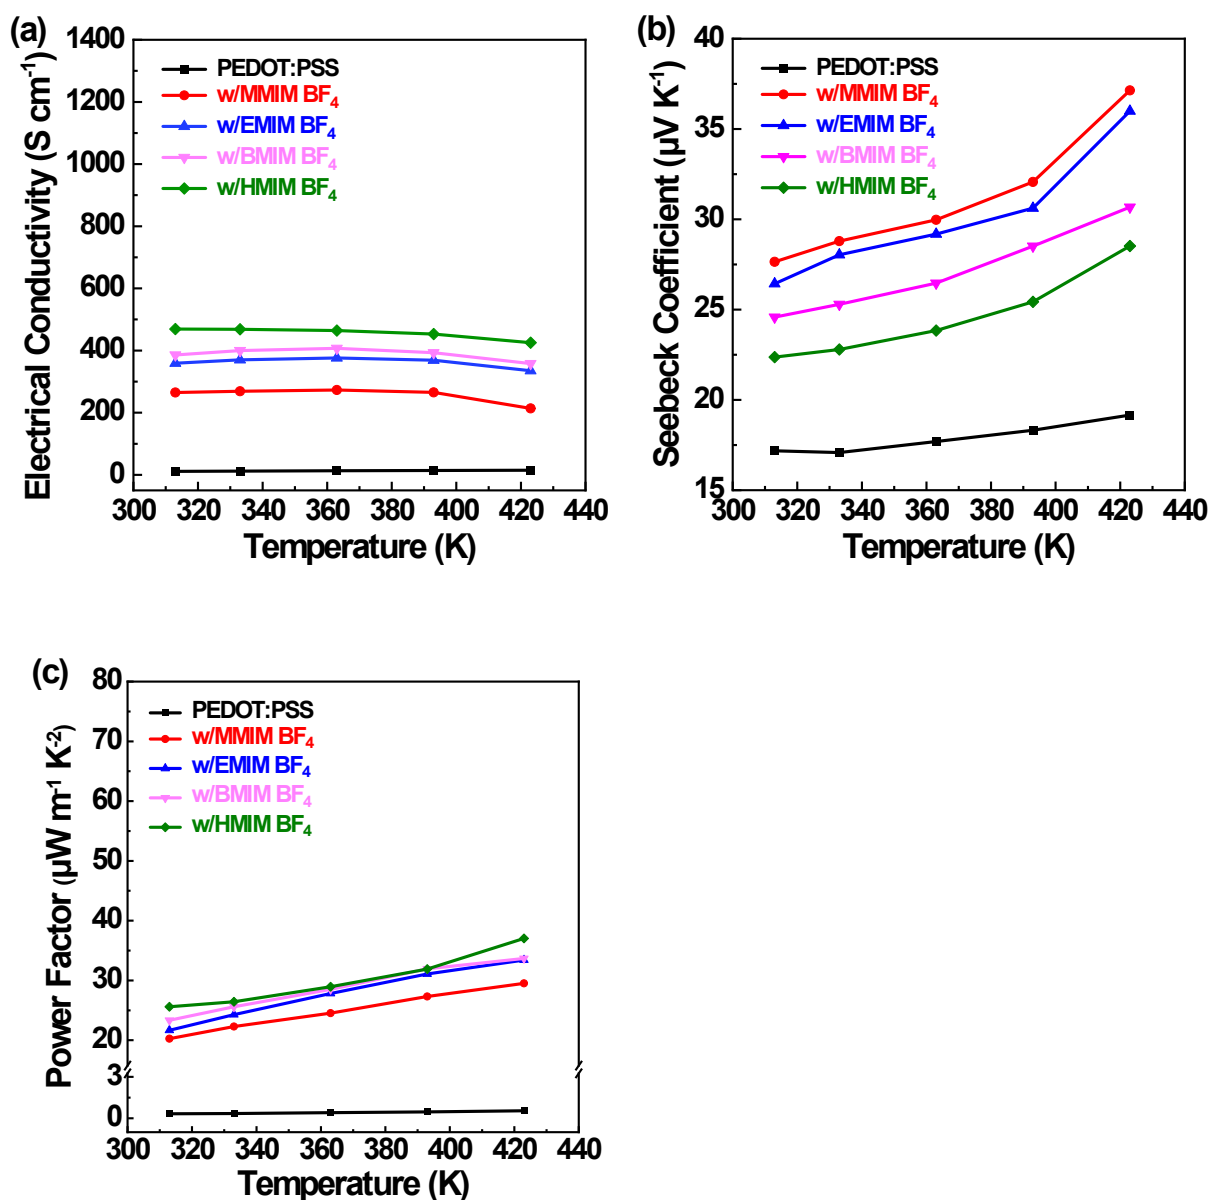

**Fig. S2** Temperature-dependent (a) electrical conductivity, (b) Seebeck coefficient, and (c) power factor of the spin-coated pristine PEDOT:PSS and PEDOT:PSS/XMIM BF<sub>4</sub> (1%) hybrid films without DMSO post-treatment. It is noted that the PEDOT:PSS mixed with MMIM BF<sub>4</sub>, EMIM BF<sub>4</sub>, BMIM BF<sub>4</sub>, HMIM BF<sub>4</sub> is denoted as w/MMIM BF<sub>4</sub>, w/EMIM BF<sub>4</sub>, w/BMIM BF<sub>4</sub>, w/HMIM BF<sub>4</sub> respectively.

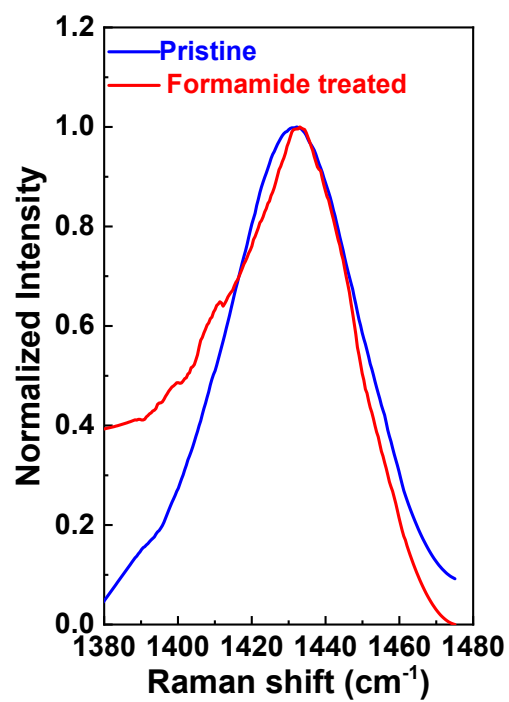

**Fig. S3** Raman spectra of spin-coated pristine PEDOT:PSS films and one with formamide post-treatment.

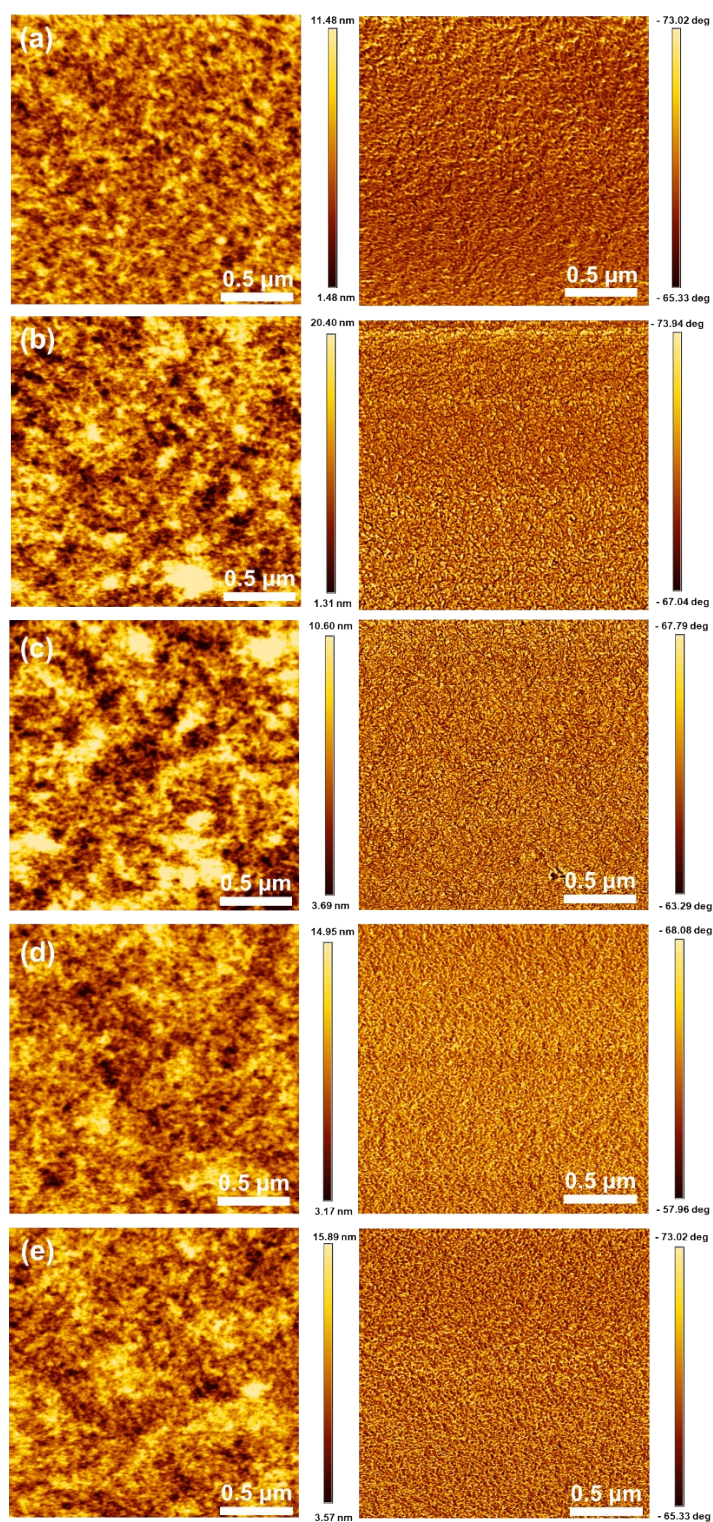

**Fig. S4** AFM height (left) and phase (right) images of spin-coated (a) pristine PEDOT:PSS films and (b) PEDOT:PSS/MMIM BF<sub>4</sub>, (c) PEDOT:PSS/EMIM BF<sub>4</sub>, (d) PEDOT:PSS/BMIM BF<sub>4</sub>, (e) PEDOT:PSS/HMIM BF<sub>4</sub> hybrid films with formamide post treatment.

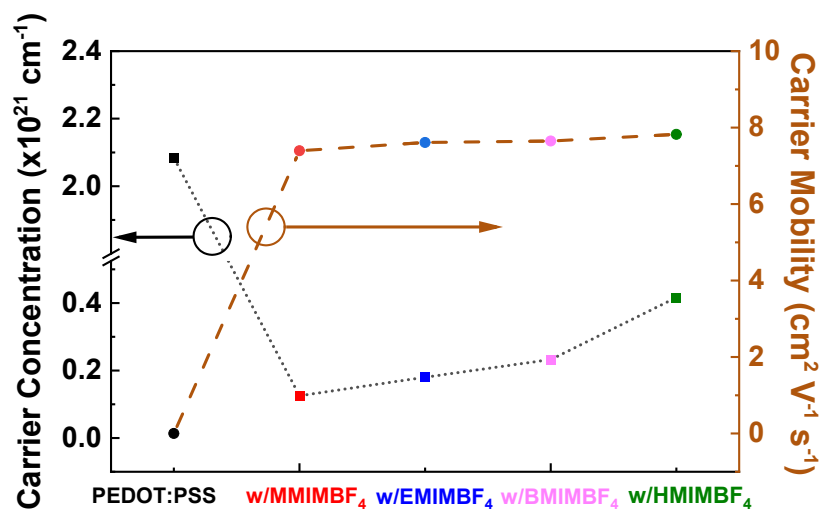

**Fig. S5** Hall effect measurement of carrier concentration and mobility of spin-coated pristine PEDOT:PSS and PEDOT:PSS/XMIM BF<sub>4</sub> hybrid films with formamide post treatment.

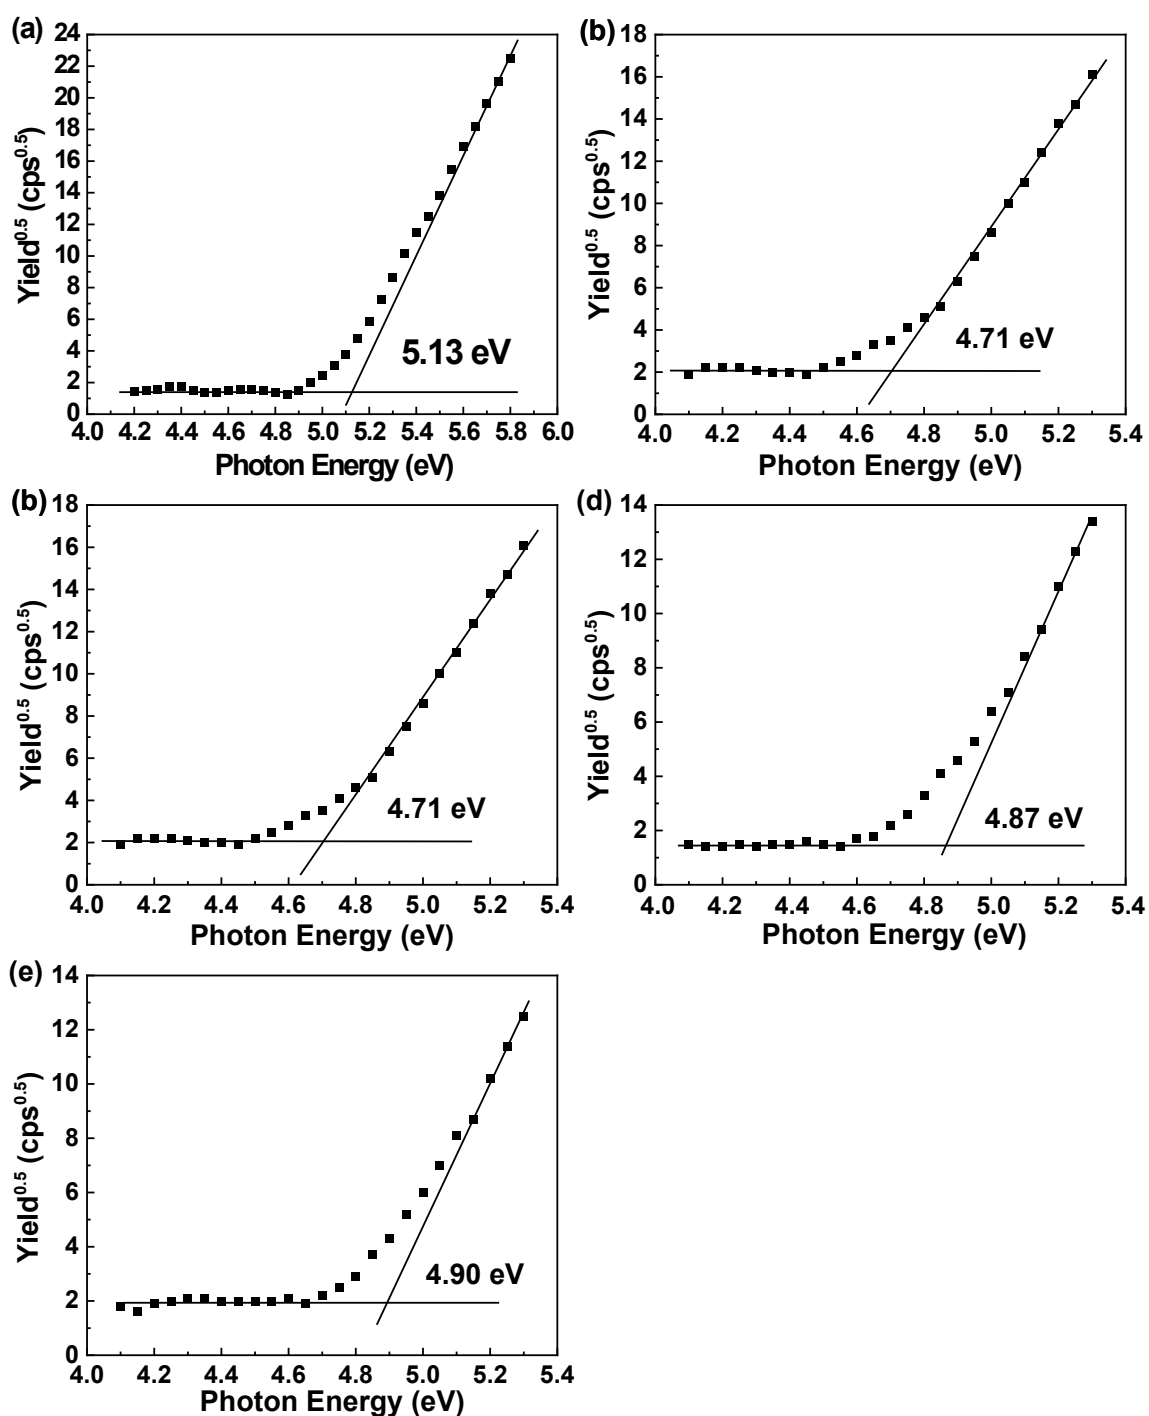

**Fig. S6** Photoelectron spectroscopy in air (PESA) measurement of spin-coated (a) pristine PEDOT:PSS films and (b) PEDOT:PSS/MMIM BF<sub>4</sub>, (c) PEDOT:PSS/EMIM BF<sub>4</sub>, (d) PEDOT:PSS/BMIM BF<sub>4</sub>, (e) PEDOT:PSS/HMIM BF<sub>4</sub> hybrid films with formamide post treatment.



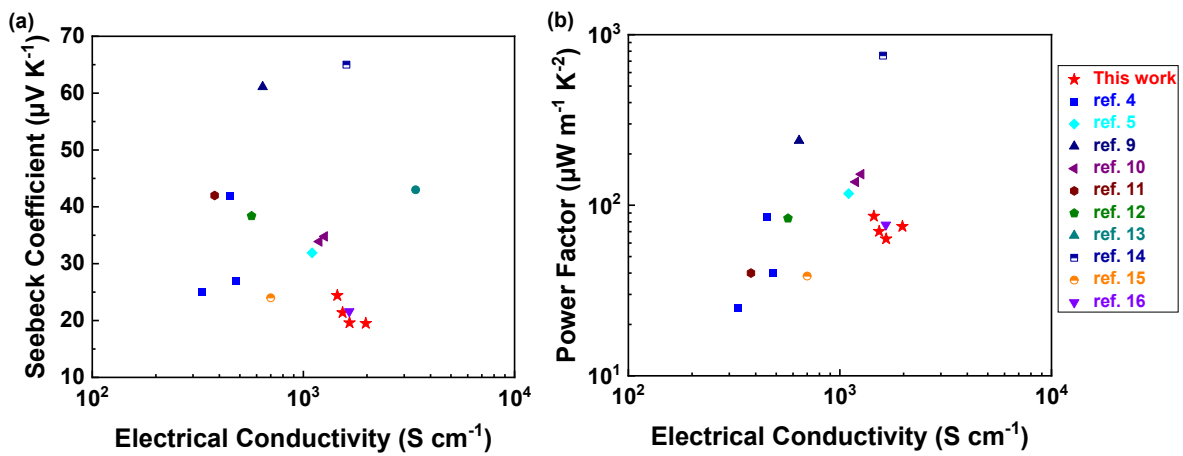

**Fig. S7** (a) Seebeck coefficient and (b) power factor vs. electrical conductivity for previously reported PEDOT:PSS films post-treated ionic liquids and this work.

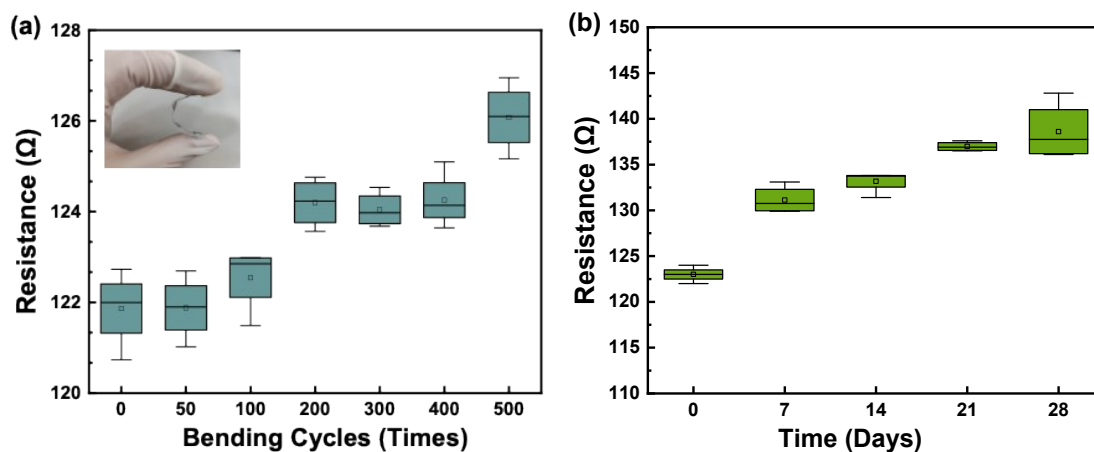

**Fig. S8** Relative resistance of the flexible thermoelectric generators versus (a) the bending cycles at bending radius of 3 mm (The inset shows photo of assembled thermoelectric generator supported by PET and demonstrates good flexibility) and (b) time under the ambient condition (relative humidity of  $\sim$  40%, room temperature).

## Reference

1. Q. K. Li, M. J. Deng, S. M. Zhang, D. K. Zhao, Q. L. Jiang, C. F. Guo, Q. Zhou and W. S. Liu, *J. Mater. Chem. C*, 2019, **7**, 4374-4381.
2. A. Mazaheripour, S. Majumdar, D. Hanemann-Rawlings, E. M. Thomas, C. McGuiness, L. d'Alencon, M. L. Chabinyk and R. A. Segalman, *Chem. Mater.*, 2018, **30**, 4816-4822.
3. S. Kee, H. Kim, S. H. K. Paleti, A. El Labban, M. Neophytou, A.-H. Emwas, H. N. Alshareef and D. Baran, *Chem. Mater.*, 2019, **31**, 3519-3526.
4. N. Saxena, B. Pretzl, X. Lamprecht, L. Bießmann, D. Yang, N. Li, C. Bilko, S. Bernstorff and P. Müller-Buschbaum, *ACS Appl. Mater. Interfaces*, 2019, **11**, 8060-8071.
5. Q. Li, Q. Zhou, L. Wen and W. Liu, *J. Materiomics*, 2020, **6**, 119-127.
6. X. Li, R. Zou, Z. Liu, J. Mata, B. Storer, Y. Chen, W. Qi, Z. Zhou and P. Zhang, *npj Flex. Electron.*, 2022, **6**, 6.
7. N. Kim, S. Lienemann, I. Petsagkourakis, D. A. Mengistie, S. Kee, T. Ederth, V. Gueskine, P. Leclere, R. Lazzaroni, X. Crispin and K. Tybrandt, *Nat. Commun.*, 2020, **11**, 1424.
8. C. Liu, J. Xu, B. Lu, R. Yue and F. Kong, *J. Electron. Mater.*, 2012, **41**, 639-645.
9. T. A. Yemata, Y. Zheng, A. K. K. Kyaw, X. Wang, J. Song, W. S. Chin and J. Xu, *Front. Chem.*, 2020, **7**, 870.
10. T. A. Yemata, Y. Zheng, A. K. K. Kyaw, X. Z. Wang, J. Song, W. S. Chin and J. W. Xu, *Mater. Adv.*, 2020, **1**, 3233-3242.
11. J. Atoyo, M. R. Burton, J. McGettrick and M. J. Carnie, *Polymers*, 2020, **12**, 559.
12. M. Z. Du, X. Y. Chen and K. Zhang, *ACS Appl. Energy Mater.*, 2021, **4**, 4070-4080.
13. H. Cheng and J. Ouyang, *Adv. Energy Mater.*, 2020, **10**, 2001633.
14. Z. Fan, D. Du, X. Guan and J. Ouyang, *Nano Energy*, 2018, **51**, 481-488.
15. J. J. Luo, D. Billep, T. Waechtler, T. Otto, M. Toader, O. Gordan, E. Sheremet, J. Martin, M. Hietschold, D. R. T. Zahnd and T. Gessner, *J. Mater. Chem. A*, 2013, **1**, 7576-7583.
16. Y. N. Lu, A. Y. Wu, C. W. Sha, X. C. Hang and D. J. Young, *Chem Asian J.*, 2021, **16**, 2740-2744.
17. C. Wang, K. Sun, J. Fu, R. Chen, M. Li, Z. Zang, X. Liu, B. Li, H. Gong and J. Ouyang, *Adv. Sustainable Syst.*, 2018, **2**, 1800085.

18. S. Ferhat, C. Domain, J. Vidal, D. Noël, B. Ratier and B. Lucas, *Sustainable Energy Fuels*, 2018, **2**, 199-208.
19. S. Hwang, I. Jeong, J. Park, J.-K. Kim, H. Kim, T. Lee, J. Kwak and S. Chung, *ACS Appl. Mater. Interfaces*, 2020, **12**, 26250-26257.
20. Z. Li, H. Sun, C.-L. Hsiao, Y. Yao, Y. Xiao, M. Shahi, Y. Jin, A. Cruce, X. Liu, Y. Jiang, W. Meng, F. Qin, T. Ederth, S. Fabiano, W. M. Chen, X. Lu, J. Birch, J. W. Brill, Y. Zhou, X. Crispin and F. Zhang, *Adv. Electron. Mater.*, 2018, **4**, 1700496.
21. S. Xu, M. Hong, X.-L. Shi, Y. Wang, L. Ge, Y. Bai, L. Wang, M. Dargusch, J. Zou and Z.-G. Chen, *Chem. Mater.*, 2019, **31**, 5238-5244.
22. E. Yvenou, M. Sandroni, A. Carella, M. N. Gueye, J. Faure-Vincent, S. Pouget, R. Demadrille and J.-P. Simonato, *Mater. Chem. Front.*, 2020, **4**, 2054-2063.
23. I. Paulraj, T.-F. Liang, T.-S. Yang, C.-H. Wang, J.-L. Chen, Y. W. Wang and C.-J. Liu, *ACS Appl. Mater. Interfaces*, 2021, **13**, 42977-42990.
24. N. Wen, Z. Fan, S. Yang, Y. Zhao, C. Li, T. Cong, H. Huang, J. Zhang, X. Guan and L. Pan, *Chem. Eng. J.*, 2021, **426**, 130816.
25. J. Liu, Y. Jia, Q. Jiang, F. Jiang, C. Li, X. Wang, P. Liu, P. Liu, F. Hu, Y. Du and J. Xu, *ACS Appl. Mater. Interfaces*, 2018, **10**, 44033-44040.
26. A. F. Al Naim, S. S. Ibrahim and A. g. El-Shamy, *Polymer*, 2021, **226**, 123792.
27. Y. Pan, Y. Song, Q. Jiang, Y. Jia, P. Liu, H. Song and G. Liu, *Synth. Met.*, 2022, **283**, 116969.
28. H. Song and K. Cai, *Energy*, 2017, **125**, 519-525.
